# Supplementary material for: Exploring the Interplay of Willingness to Communicate and Motivation among Pakistani ESL Undergraduate Students
Source: Research Square preprint supplement (doi:10.21203/rs.3.rs-7932499/v1), 2025-12-05
Supplement: Supplementary file 1 [file a4af8acaca098ddad9cc5562.docx]

## Appendix I

**The Effect of Willingness to Communicate on Language Learning Anxiety, Motivation and Speaking Ability of Pakistani University Students**

**Appendix I**

**Part 01: Participant’s Degree of Willingness to Speak Measure** Directions: Statements 1 through 27 refer to how willing you feel to speak in English language with others. For each statement, please indicate whether you are (1) Never Willingness to speak, (2) Rarely Willing to speak (3) Sometimes willing to speak, (4 Frequently willing to speak, or (5) Always willing to speak *

**Participant’s Degree of Willingness to Speak Measure**

1. Volunteering to speak individually in class

2. Presenting a lecture in front of class

3. Speaking when I am sitting in the back of the classroom

4. Discussing a topic with my teacher when (s)he has a different view

5. Trying to talk than listen during a conversation

6. Volunteering to answer when teacher asks a question

7. Talking in large groups

8. Speaking when no one else is speaking

9. Speaking when I am sitting in front of the classroom

10. Speaking to a classmate who is of the opposite sex

11. Speaking to a classmate who is younger than me

12. Helping other classmates answer a question

13. Discussing a topic with my friends when our opinions are different

14. Asking a question in class

15. Presenting my opinions in class

16. Speaking about a controversial topic

17. Speaking when I know my speaking will be graded

18. Speaking to a classmate who is older than me

19. Talking in small groups

20. Speaking about a topic when I am prepared

21. Talking in pairs

22. Speaking about a topic that I am comfortable with

23. Speaking when I am sure that my answer is correct

24. Speaking about a topic I am familiar with

25. Speaking about a topic I am interested in

26. Volunteering to participate in class discussions

27Speaking about social issues

## APPENDIX II:

**Appendix II**

**Part 02: Foreign Language Learning Anxiety Scale** Directions: Statements 1 through 33 refer to how you feel about English when you read, write, or communicate with others. For each statement, please indicate whether you (1) Strongly Disagree(2) Disagree(3) Neither Agree Nor Disagree (4) Agree (5)Strongly Agree by marking the appropriate number on the line following each statement. Please give your first reaction to each statement and mark one answer for each statement. *

**Foreign Language Learning Anxiety Scale**

1. I never feel quite sure of myself when I am speaking in my English language class.

2. I don't worry about making mistakes in language class

3. I tremble when I know that I'm going to be called on in language class.

4. It frightens me when I don't understand what the teacher is saying in the English language.

5. It wouldn't bother me at all to take more English language classes.

6. During language class, I find myself thinking about things that have nothing to do with the course.

7. I keep thinking that the other students are better at languages than I am.

8. I am usually at ease during tests in my language class.

9. I start to panic when I have to speak without preparation in language class.

10. I worry about the consequences of failing my English language class.

11. I don't understand why some people get so upset over English language classes.

12. In language class, I can get so nervous I forget things I know.

13. It embarrasses me to volunteer answers in my language class.

14. I would not be nervous speaking the English language with native speakers.

15. I get upset when I don't understand what the teacher is correcting.

16. Even if I am well prepared for language class, I feel anxious about it.

17. I often feel like not going to my language class.

18. I feel confident when I speak in English language class.

19. I am afraid that my language teacher is ready to correct every mistake I make.

20. I can feel my heart pounding when I'm going to be called on in language class.

21. The more I study for a language test, the more confused I get.

22. I don't feel pressure to prepare very well for language class.

23. I always feel that the other students speak the English language better than I do.

24. I feel very self-conscious about speaking the English language in front of other students

25. Language class moves so quickly I worry about getting left behind.

26. I feel more tense and nervous in my language class than in my other classes.

27. I get nervous and confused when I am speaking in my language class.

28.When I'm on my way to language class, I feel very sure and relaxed.

29. I get nervous when I don't understand every word the language teacher says.

30. I feel overwhelmed by the number of rules you have to learn to speak English language.

31. I am afraid that the other students will laugh at me when I speak the English language.

32. I would probably feel comfortable around native speakers of the English language.

33. I get nervous when the language teacher asks questions which I haven't prepared in advance.
